# Supplementary material
Source: PubMed Central journal article supplement (PMC2719112)
Supplement: pp.109.139287_1.pdf [file pp.109.139287_1.pdf]

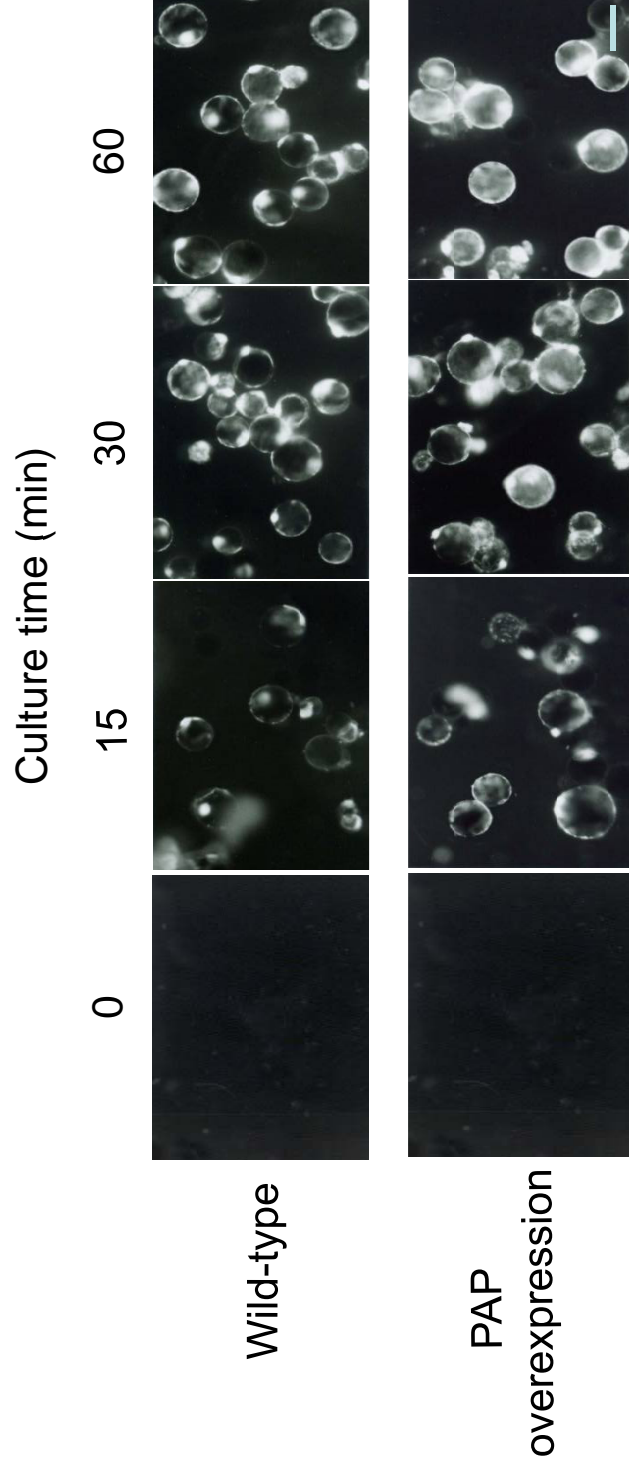

Supplementary Figure 1. Wall regeneration in tobacco protoplasts overexpressing purple acid phosphatase.  $\beta$ -Glucan was stained with Calcofluor White. Bar = 100  $\mu$ m.
