# Supplementary material
Source: PubMed Central journal article supplement (PMC2719112)
Supplement: pp.109.139287_2.pdf [file pp.109.139287_2.pdf]

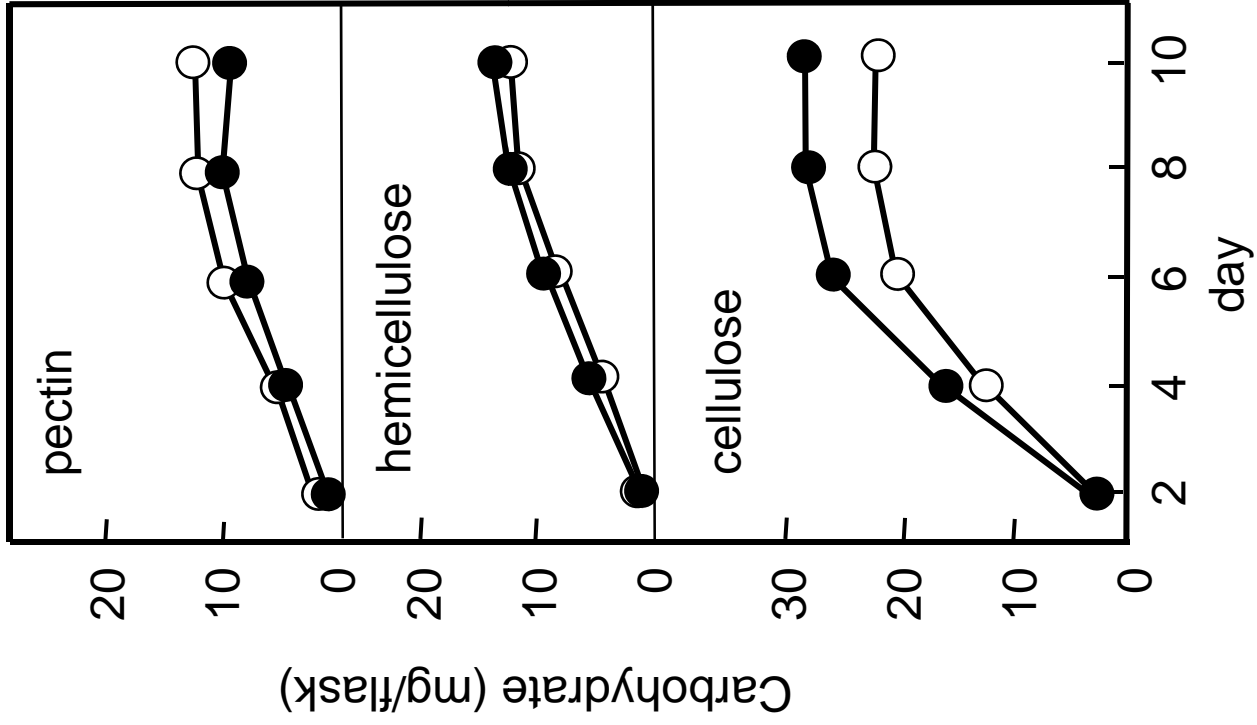

Supplementary Figure 2.  
Carbohydrate contents of the cell walls recovered from growing cells suspension cultures. Wild-type cells (open circle) and cells overexpressing PAP (closed circle).
